# Supplementary material for: Microalgae: a sustainable adsorbent with high potential for upconcentration of indium(iii) from liquid process and waste streams
Source: Royal Society of Chemistry journal article supplement (doi:10.1039/c9gc03073e), 2020-01-01
Supplement: c9gc03073e1.pdf [file c9gc03073e1.pdf]

## Supplementary information

### **Microalgae: A sustainable adsorbent with high potential for upconcentration of indium(III) from liquid process and waste streams**

Nina Ricci Nicomel<sup>a,\*</sup>, Lila Otero-Gonzalez<sup>a</sup>, Larissa Arashiro<sup>a,b</sup>, Marianna Garfi<sup>b</sup>, Ivett Ferrer<sup>b</sup>, Pascal Van Der Voort<sup>c</sup>, Kim Verbeken<sup>d</sup>, Tom Hennebel<sup>e</sup>, Gijs Du Laing<sup>a</sup>

<sup>a</sup> Laboratory of Analytical Chemistry and Applied Ecochemistry, Department of Green Chemistry and Technology, Ghent University, Coupure Links 653, 9000 Ghent, Belgium

<sup>b</sup> Group of Environmental Engineering and Microbiology, Department of Civil and Environmental Engineering, Universitat Politècnica de Catalunya·BarcelonaTech, c/ Jordi Girona 1-3, Building D1, 08034 Barcelona, Spain

<sup>c</sup> Center for Ordered Materials, Organometallics and Catalysis, Department of Inorganic and Physical Chemistry, Ghent University, Krijgslaan 281 (S3), 9000 Ghent, Belgium

<sup>d</sup> Department of Materials, Textiles and Chemical Engineering, Ghent University, Technologiepark Zwijnaarde 46, 9052 Zwijnaarde, Belgium

<sup>e</sup> Center for Microbial Ecology and Technology, Department of Biochemical and Microbial Technology, Ghent University, Coupure Links 653, 9000 Ghent, Belgium

\* Corresponding author:

E-mail: [NinaRicci.Nicomel@UGent.be](mailto:NinaRicci.Nicomel@UGent.be)

Tel.: +3292646131

Fax: +3292646232

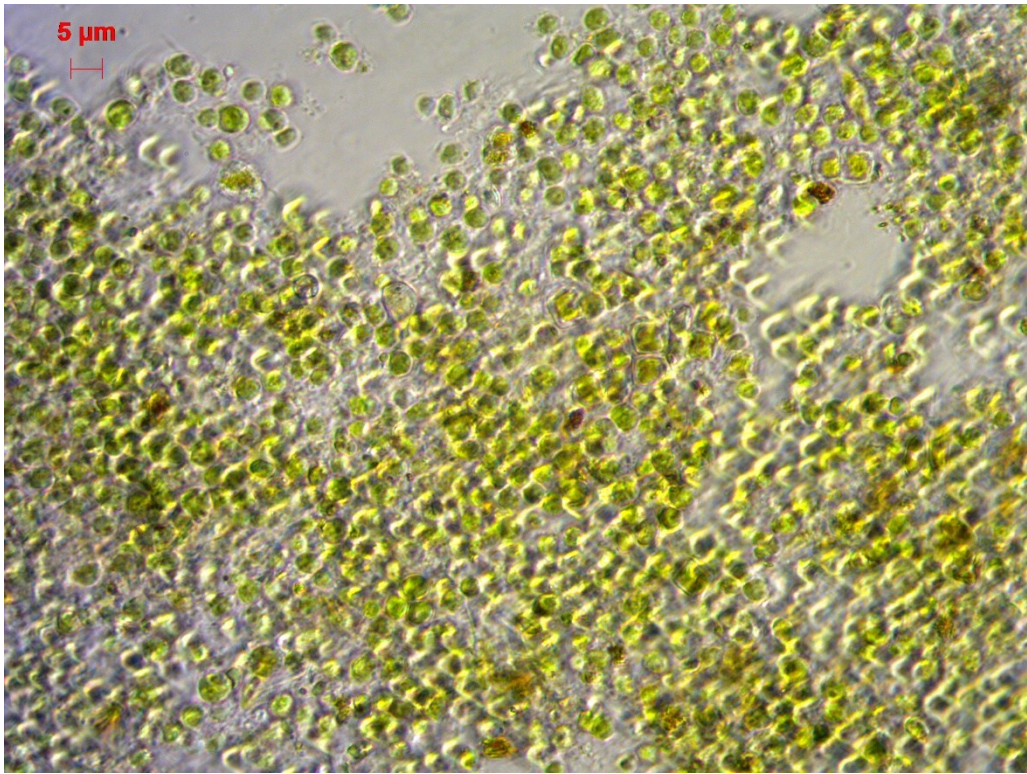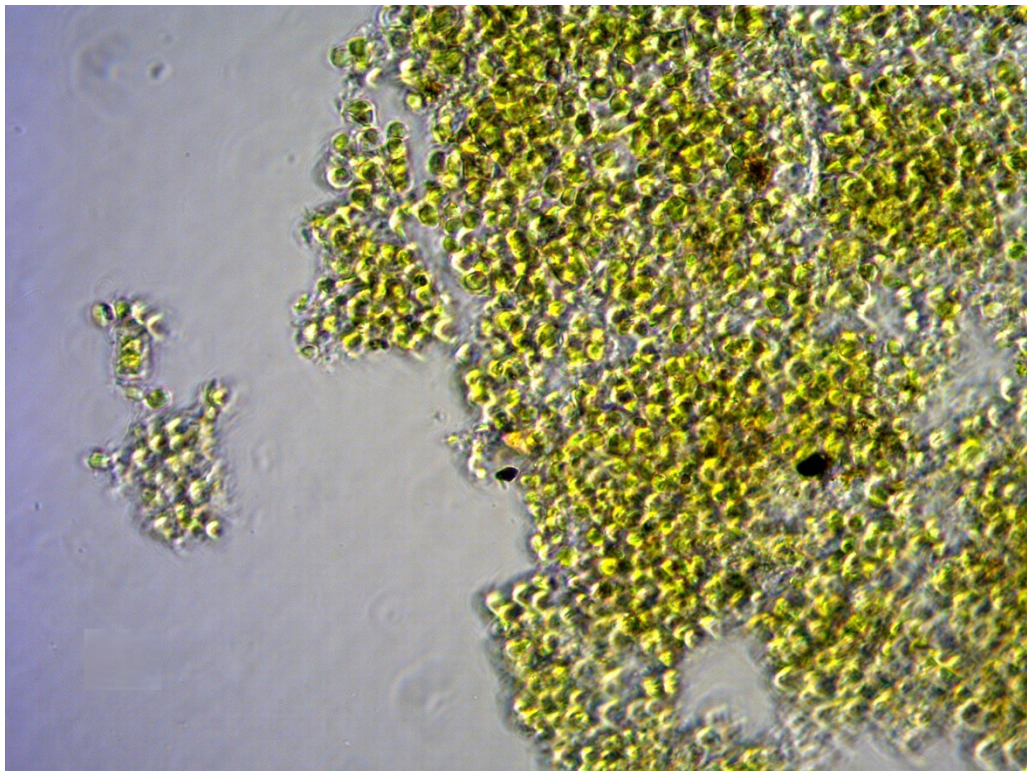

**Figure S1.** Light microscope images of the microalgal biomass before grinding (top) and after grinding (bottom).

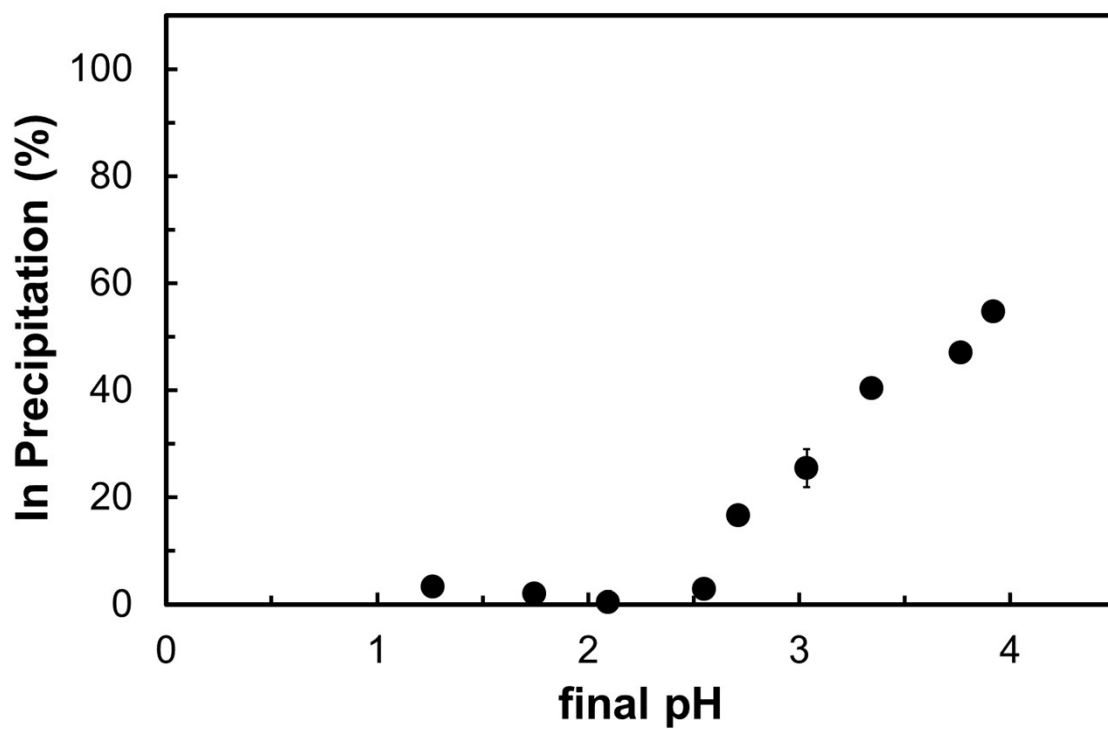

**Figure S2.** Percentage of indium precipitation as a function of pH. Experimental conditions: initial In(III) concentration = 0.15 mM; contact time = 24 hours; room temperature.

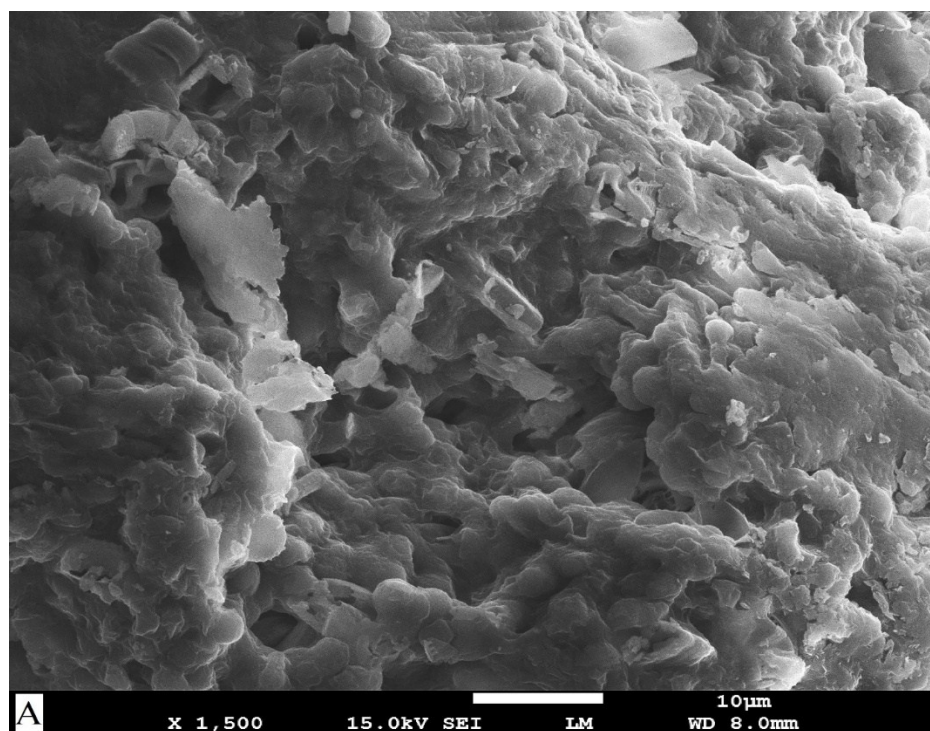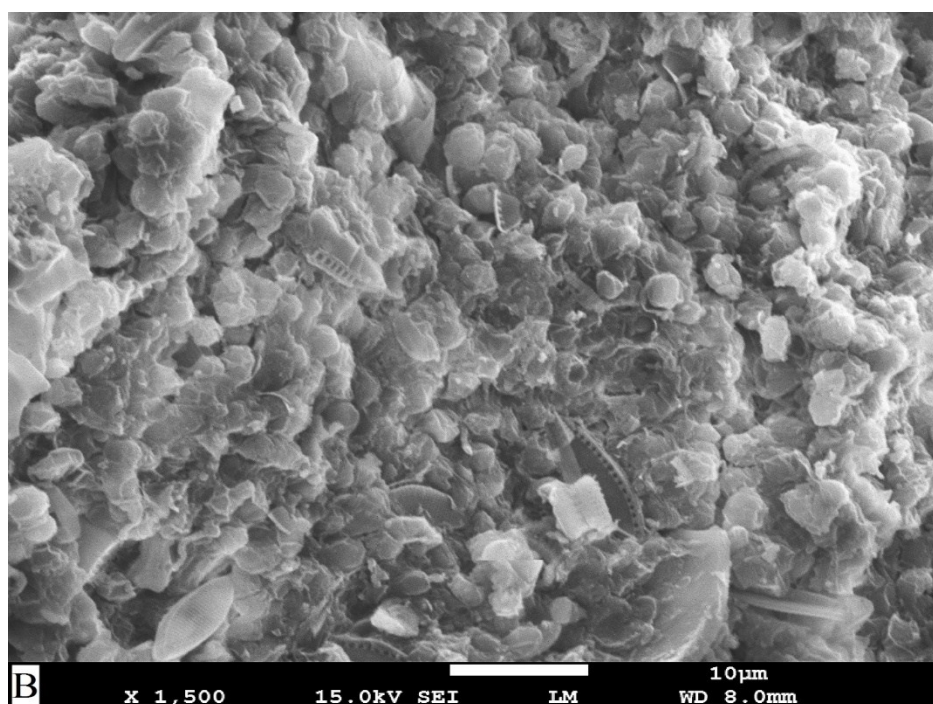

**Figure S3.** SEM images of the microalgal biomass surface (A) before and (B) after In(III) biosorption.

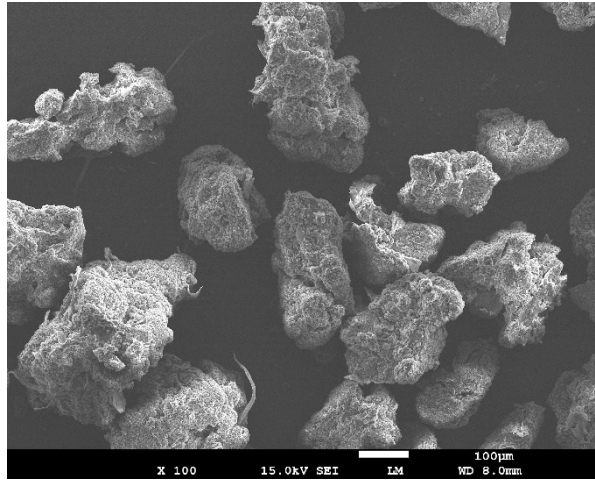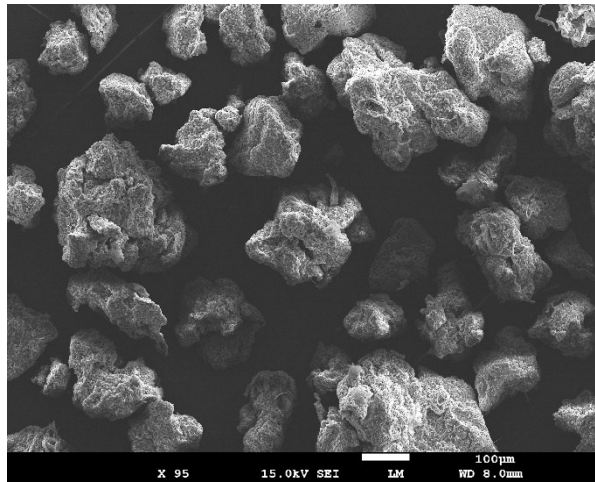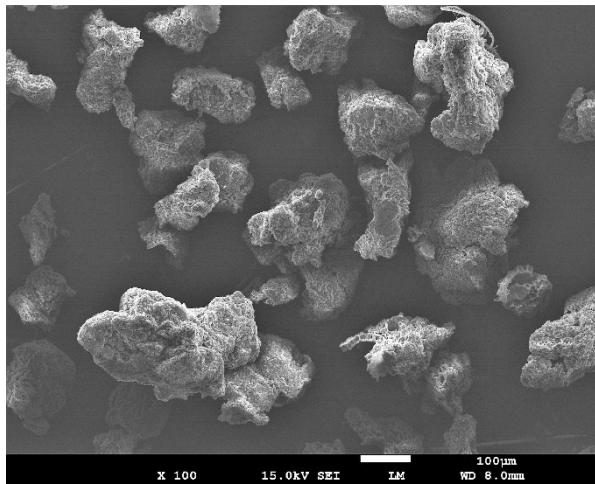

**Figure S4.** SEM images of the microalgal biomass particles before In(III) adsorption (top), after In(III) adsorption (middle), and after In(III) desorption (bottom).

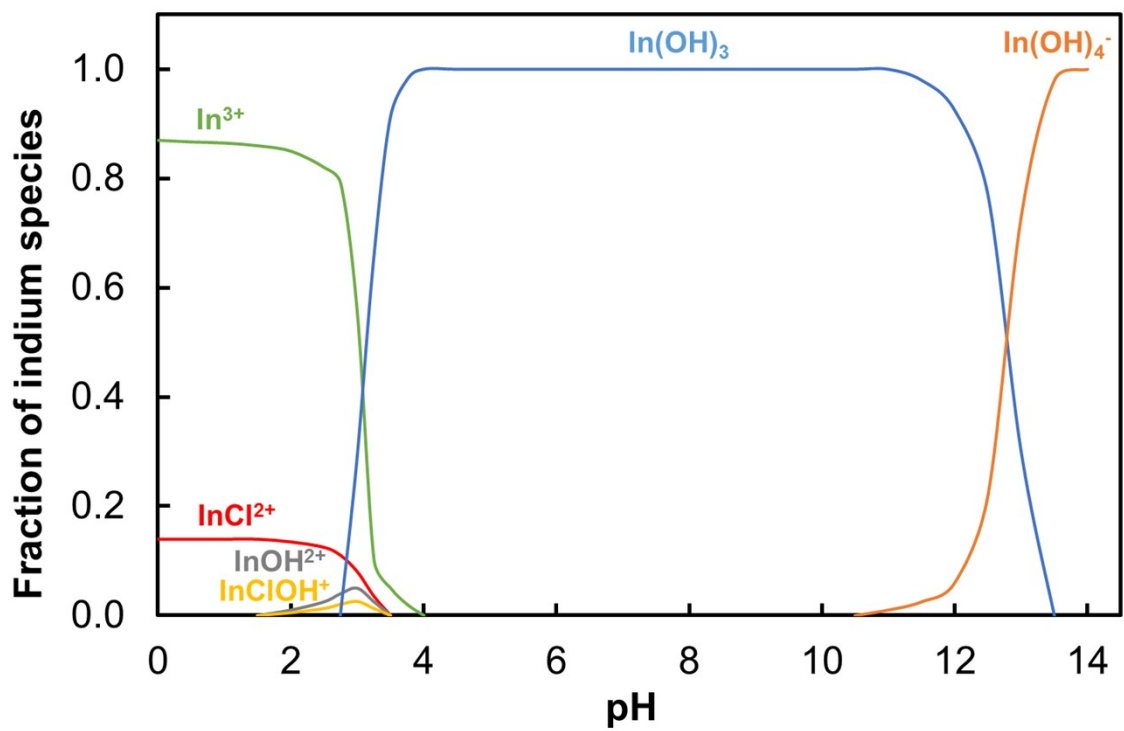

**Figure S5.** Predicted indium speciation in aqueous solution using the Hydra-Medusa software (indium concentration = 0.15 mM; chloride concentration = 0.30 mM).

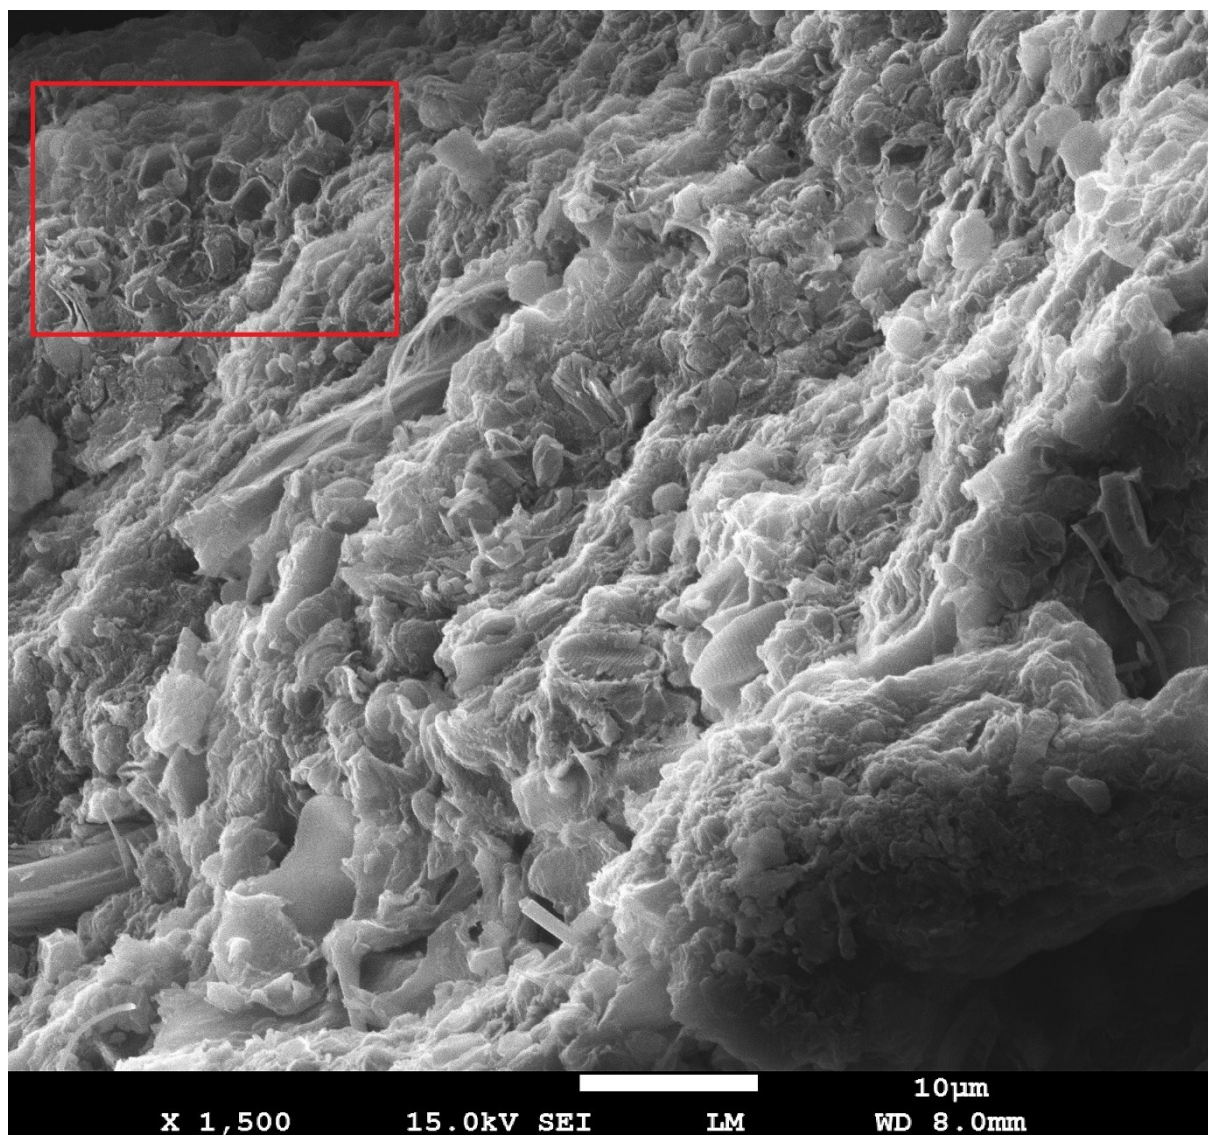

**Figure S6.** SEM image of the microalgal biomass after In(III) desorption using 0.1 M HCl. The highlighted part in red shows a portion of the surface that was possibly destroyed because of the desorption process.



**Table S1.** Constants and correlation coefficients of Langmuir isotherm model for Cu(II), Zn(II), Sn(II), Al(III), and Fe(III) biosorption using microalgal biomass at an initial pH of 2.

| <b>Langmuir Isotherm model</b> | <b>Parameter</b>    | <b>Value</b> |
|--------------------------------|---------------------|--------------|
| <i>Cu(II)</i>                  | $q_{\max}$ (mmol/g) | 0.05         |
|                                | $b$ (L/mmol)        | 0.38         |
|                                | $R^2$               | 0.99         |
| <i>Zn(II)</i>                  | $q_{\max}$ (mmol/g) | 0.05         |
|                                | $b$ (L/mmol)        | 0.18         |
|                                | $R^2$               | 0.92         |
| <i>Sn(II)</i>                  | $q_{\max}$ (mmol/g) | 1.01         |
|                                | $b$ (L/mmol)        | 1.06         |
|                                | $R^2$               | 0.95         |
| <i>Al(III)</i>                 | $q_{\max}$ (mmol/g) | 0.11         |
|                                | $b$ (L/mmol)        | 2.92         |
|                                | $R^2$               | 0.95         |
| <i>Fe(III)</i>                 | $q_{\max}$ (mmol/g) | 0.57         |
|                                | $b$ (L/mmol)        | 0.51         |
|                                | $R^2$               | 0.95         |

*Note:* Sn(II) removal was most likely because of precipitation because of the white insoluble solids formed during the incubation of the samples. This suggests that the actual  $q_{\max}$  for Sn(II) is lower than the obtained  $q_{\max}$ .
